# Supplementary material
Source: MDPI journal article supplement (https://www.mdpi.com/1999-4907/13/7/1089)
Supplement: s1 [file s1]

**Table S3.** Yield of short-rotation crops with different planting densities and rotation (according to IPC Poplars and willows in wood production and land use; Food & Agriculture Org., 1979; ISBN 9251005001)

| Spacing (m) | Density<br>(trees·ha <sup>-1</sup> ) | Planting material | Rotation<br>length (years) | Volume<br>(m <sup>3</sup> ·year <sup>-1</sup> ·ha <sup>-1</sup> ) |
|-------------|--------------------------------------|-------------------|----------------------------|-------------------------------------------------------------------|
| 2 × 2       | 2500                                 | cuttings          | 6                          | 29                                                                |
| 2 × 2       | 2500                                 | 1-year material   | 5                          | 40                                                                |
| 2 × 2       | 2500                                 | 2-year material   | 4                          | 50                                                                |
| 3 × 2       | 1670                                 | cuttings          | 7                          | 29                                                                |
| 3 × 2       | 1670                                 | 1-year material   | 6                          | 36                                                                |
| 3 × 2       | 1670                                 | 2-year material   | 5                          | 43                                                                |
| 3 × 3       | 1100                                 | cuttings          | 8                          | 29                                                                |
| 3 × 3       | 1100                                 | 1-year material   | 7                          | 34                                                                |
| 3 × 3       | 1100                                 | 2-year material   | 6                          | 39                                                                |
| 4 × 3       | 833                                  | 2-year material   | 7                          | 37                                                                |
| 4 × 4       | 625                                  | 2-year material   | 8                          | 33                                                                |
