# Supplementary material
Source: MDPI journal article supplement (https://www.mdpi.com/1999-4907/13/7/1089)
Supplement: s1 [file s1]

## Supplementary Materials

**Table S1.** Biomass yield for different rotation length, planting density and site conditions

| No. | Clone | Spacing<br>(m x m)            | Planting density<br>(trees·ha <sup>-1</sup> ) | Rotation<br>length (years) | Total biomass<br>(Mg·ha <sup>-1</sup> ) | Yield<br>(Mg·ha <sup>-1</sup> ·year <sup>-1</sup> ) | TEMP/ PCPN<br>(°C / mm)   | Data sources    |
|-----|-------|-------------------------------|-----------------------------------------------|----------------------------|-----------------------------------------|-----------------------------------------------------|---------------------------|-----------------|
| 1   | AF2   | 3 x 1.5                       | 2222                                          | 2                          | 4.38                                    | 2.2                                                 | 7 / 550                   | [1]             |
| 2   | AF2   | 3 x 1.5                       | 2222                                          | 3                          | 14.51                                   | 4.8                                                 | 7 / 550                   | current study   |
| 3   | AF2   | 3 x 1.25                      | 2267                                          | 4                          | 38.87                                   | 9.7                                                 | 7 / 550                   | [1]             |
| 4   | AF2   | 3 x 1.25                      | 2667                                          | 5                          | 58.82                                   | 11.8                                                | 7 / 550                   | [1]             |
| 5   | AF2   | 3 x 2                         | 1667                                          | 5                          | 40.37                                   | 8.1                                                 | 7 / 550                   | current study   |
| 6   | AF2   | 3 x 2.5                       | 1333                                          | 5                          | 39.16                                   | 7.8                                                 | 7 / 550                   | [1]             |
| 7   | AF8   | 3 x 1.5                       | 2222                                          | 2                          | 4.32                                    | 2.2                                                 | 7 / 550                   | [1]             |
| 8   | AF8   | 3 x 1.5                       | 2222                                          | 3                          | 11.19                                   | 3.7                                                 | 7 / 550                   | current study   |
| 9   | AF8   | 3 x 2                         | 1667                                          | 3                          | 6.25                                    | 2.1                                                 | 7 / 550                   | current study   |
| 10  | AF8   | 3 x 2                         | 1667                                          | 5                          | 31.76                                   | 6.4                                                 | 7 / 550                   | current study   |
| 11  | AF8   | 3 x 2.5                       | 1333                                          | 5                          | 39.25                                   | 7.9                                                 | 7 / 550                   | [1]             |
| 12  | AF8   | 3 x 2                         | 1667                                          | 6                          | 64.93                                   | 10.8                                                | 7 / 550                   | current study   |
| 13  | MB915 | 1 x 1                         | 10000                                         | 6                          | 32.19                                   | 5.4                                                 | 5 / 460                   | [2]             |
| 14  | MB915 | 3 x 3                         | 1111                                          | 6                          | 6.98                                    | 1.2                                                 | 5 / 460                   | [2]             |
| 15  | MB915 | 5 x 5                         | 400                                           | 6                          | 5.00                                    | 0.8                                                 | 5 / 460                   | [2]             |
| 16  | NM6   | 3.05 x 3.05                   | 1075                                          | 5                          | 17.95                                   | 3.6                                                 | 21.5 / 591<br>(mar.-oct.) | [3] - Westport  |
| 17  | NM6   | 3.05 x 3.05                   | 1075                                          | 8                          | 52.88                                   | 6.6                                                 | 21.5 / 591<br>(mar.-oct.) | [3] - Westport  |
| 18  | NM6   | 3.05 x 3.05                   | 1075                                          | 10                         | 113.00                                  | 11.3                                                | 21.5 / 591<br>(mar.-oct.) | [3] - Westport  |
| 19  | AF2   | 2.8 x 0.6                     | 5900                                          | 2                          | 11.31                                   | 5.7                                                 | 12.9 / 710                | [4] - Bigarello |
| 20  | AF2   | 2.8 x 0.6                     | 5900                                          | 2                          | 27.93                                   | 14                                                  | 11.3 / 581                | [4] - Vinavo    |
| 21  | AF2   | 2.8 x 0.6                     | 5900                                          | 2                          | 31.53                                   | 15.8                                                | 12.9 / 910                | [4] - Mira      |
| 22  | AF8   | 2.8 x 0.6                     | 5900                                          | 2                          | 9.50                                    | 4.8                                                 | 12.9 / 710                | [4] - Bigarello |
| 23  | AF8   | 2.8 x 0.6                     | 5900                                          | 2                          | 25.73                                   | 12.9                                                | 11.3 / 581                | [4] - Vinavo    |
| 24  | AF8   | 2.8 x 0.6                     | 5900                                          | 2                          | 29.86                                   | 14.9                                                | 12.9 / 910                | [4] - Mira      |
| 25  | AF2   | 2.8 x 0.5                     | 7140                                          | 2                          | 11.48                                   | 5.7                                                 | 15.3 / 627.5              | [5]             |
| 26  | AF2   | 2.8 x 0.5                     | 7140                                          | 3                          | 25.65                                   | 8.6                                                 | 15.3 / 627.5              | [5]             |
| 27  | AF2   | Twin-rows (0.5)<br>2.8 x 0.75 | 10360                                         | 2                          | 15.41                                   | 7.7                                                 | 15.3 / 627.5              | [5]             |
| 28  | AF2   | Twin-rows (0.5)<br>2.8 x 0.75 | 10360                                         | 3                          | 35.14                                   | 11.7                                                | 15.3 / 627.5              | [5]             |

|    |              |                                 |       |   |       |      |             |      |
|----|--------------|---------------------------------|-------|---|-------|------|-------------|------|
| 29 | AF2          | 3 x 0.6                         | 5500  | 1 | 3.73  | 3.7  | 5.5 / 595   | [6]  |
| 30 | AF2          | Twin-rows (0.45)<br>3.75 x 0.75 | 11000 | 1 | 4.83  | 4.8  | 5.5 / 595   | [6]  |
| 31 | AF2          | 3 x 0.6                         | 5500  | 2 | 10.3  | 5.2  | 5 / 551     | [6]  |
| 32 | AF2          | Twin-rows (0.45)<br>3.75 x 0.75 | 11000 | 2 | 13.93 | 7    | 5 / 551     | [6]  |
| 33 | AF2          | 3 x 0.55                        | 6061  | 2 | 16.5  | 8.3  | 11.3 / 765  | [7]  |
| 34 | AF8          | 3 x 0.55                        | 6061  | 2 | 15.0  | 7.5  | 11.3 / 765  | [7]  |
| 35 | Poplar clone | na                              | 5747  | 3 | 17.4  | 5.8  | na          | [8]  |
| 36 | Poplar clone | na                              | 10000 | 2 | 25.0  | 12.5 | na          | [8]  |
| 37 | Poplar clone | na                              | 10000 | 2 | 26.0  | 13.0 | na          | [8]  |
| 38 | Poplar clone | na                              | 1333  | 5 | 81    | 16.2 | na          | [8]  |
| 39 | Poplar clone | na                              | 1666  | 5 | 55.5  | 11.1 | na          | [8]  |
| 40 | Poplar clone | na                              | 4166  | 2 | 9.6   | 4.8  | na          | [8]  |
| 41 | Poplar clone | na                              | 13675 | 2 | 17.8  | 8.9  | na          | [8]  |
| 42 | Poplar clone | na                              | 10000 | 3 | 24.9  | 8.3  | na          | [8]  |
| 43 | Poplar clone | na                              | 5500  | 2 | 22.2  | 11.1 | na          | [8]  |
| 44 | AF2          | 0.7 – 0.5 x 0.15                | 10000 | 3 | 3.34  | 1.1  | na          | [9]  |
| 45 | AF8          | 0.7 – 0.5 x 0.15                | 10000 | 3 | 2.66  | 0.9  | na          | [9]  |
| 46 | NL-80351     | 3 x 3                           | 1111  | 4 | 49    | 12.3 | 14.3 / 964  | [10] |
| 47 | NL-80351     | 3 x 3                           | 1111  | 5 | 61    | 12.2 | 14.3 / 964  | [10] |
| 48 | NL-80351     | 3 x 3                           | 1111  | 6 | 73    | 12.2 | 14.3 / 964  | [10] |
| 49 | NL-80351     | 3 x 4                           | 833   | 4 | 48    | 12.0 | 14.3 / 964  | [10] |
| 50 | NL-80351     | 3 x 4                           | 833   | 5 | 64    | 12.8 | 14.3 / 964  | [10] |
| 51 | NL-80351     | 3 x 4                           | 833   | 6 | 75    | 12.5 | 14.3 / 964  | [10] |
| 52 | NL-80351     | 4 x 4                           | 625   | 4 | 40    | 10.0 | 14.3 / 964  | [10] |
| 53 | NL-80351     | 4 x 4                           | 625   | 5 | 55    | 11.0 | 14.3 / 964  | [10] |
| 54 | NL-80351     | 4 x 4                           | 625   | 6 | 66.5  | 11.1 | 14.3 / 964  | [10] |
| 55 | NL-80351     | 4 x 5                           | 500   | 4 | 34    | 8.5  | 14.3 / 964  | [10] |
| 56 | NL-80351     | 4 x 5                           | 500   | 5 | 46.5  | 9.3  | 14.3 / 964  | [10] |
| 57 | NL-80351     | 4 x 5                           | 500   | 6 | 59    | 9.8  | 14.3 / 964  | [10] |
| 58 | D-01         | 0.5 x 0.5                       | 40000 | 1 | 4     | 4.0  | 10.3 / 1270 | [11] |
| 59 | D-01         | 0.5 x 0.5                       | 40000 | 2 | 16    | 8.0  | 10.3 / 1270 | [11] |
| 60 | D-01         | 0.5 x 0.5                       | 40000 | 3 | 33    | 11.0 | 10.3 / 1270 | [11] |
| 61 | D-01         | 0.5 x 0.5                       | 40000 | 4 | 42    | 10.5 | 10.3 / 1270 | [11] |
| 62 | D-01         | 0.5 x 0.5                       | 40000 | 5 | 55    | 11.0 | 10.3 / 1270 | [11] |
| 63 | D-01         | 0.5 x 0.5                       | 40000 | 6 | 65    | 10.8 | 10.3 / 1270 | [11] |
| 64 | D-01         | 0.5 x 0.5                       | 20000 | 7 | 75    | 10.7 | 10.3 / 1270 | [11] |
| 65 | D-01         | 1 x 1                           | 10000 | 1 | 3     | 3.0  | 10.3 / 1270 | [11] |
| 66 | D-01         | 1 x 1                           | 10000 | 2 | 8     | 4.0  | 10.3 / 1270 | [11] |

|     |             |         |       |    |       |      |             |      |
|-----|-------------|---------|-------|----|-------|------|-------------|------|
| 67  | D-01        | 1 x 1   | 10000 | 3  | 26    | 8.7  | 10.3 / 1270 | [11] |
| 68  | D-01        | 1 x 1   | 10000 | 4  | 39    | 9.8  | 10.3 / 1270 | [11] |
| 69  | D-01        | 1 x 1   | 10000 | 5  | 58    | 11.6 | 10.3 / 1270 | [11] |
| 70  | D-01        | 1 x 1   | 10000 | 6  | 64    | 10.7 | 10.3 / 1270 | [11] |
| 71  | D-01        | 1 x 1   | 10000 | 7  | 70    | 10.0 | 10.3 / 1270 | [11] |
| 72  | D-01        | 2 x 2   | 2500  | 1  | 1     | 1.0  | 10.3 / 1270 | [11] |
| 73  | D-01        | 2 x 2   | 2500  | 2  | 3     | 1.5  | 10.3 / 1270 | [11] |
| 74  | D-01        | 2 x 2   | 2500  | 3  | 15    | 5.0  | 10.3 / 1270 | [11] |
| 75  | D-01        | 2 x 2   | 2500  | 4  | 27    | 6.8  | 10.3 / 1270 | [11] |
| 76  | D-01        | 2 x 2   | 2500  | 5  | 42    | 8.4  | 10.3 / 1270 | [11] |
| 77  | D-01        | 2 x 2   | 2500  | 6  | 50    | 8.3  | 10.3 / 1270 | [11] |
| 78  | D-01        | 2 x 2   | 2500  | 7  | 63    | 9.0  | 10.3 / 1270 | [11] |
| 79  | Hybride 275 | 2 x 1   | 5000  | 3  | 11.7  | 3.9  | 10.1 / 705  | [12] |
| 80  | AF2         | 2 x 0.7 | 7143  | 3  | 11.0  | 3.7  | 9.4 / 819   | [13] |
| 81  | na          | na      | 13333 | 3  | 41.1  | 13.7 | 15.7 / 478  | [14] |
| 82  | na          | na      | 10000 | 2  | 27    | 13.5 | 14.1 / 384  | [14] |
| 83  | na          | na      | 19700 | 4  | 48    | 12   | 10.5 / 500  | [14] |
| 84  | na          | na      | 13333 | 3  | 23.1  | 7.7  | 16.6 / 390  | [14] |
| 85  | na          | na      | 10000 | 8  | 80    | 10   | 15.2 / 854  | [14] |
| 86  | na          | na      | 10000 | 2  | 31    | 15.5 | 14.5 / 550  | [14] |
| 87  | na          | na      | 13333 | 3  | 20.7  | 6.9  | 13.7 / 670  | [14] |
| 88  | na          | na      | 20000 | 3  | 48    | 16   | 12.5 / 720  | [14] |
| 89  | na          | na      | 7142  | 15 | 120   | 8    | 14.7 / 791  | [14] |
| 90  | na          | na      | 7142  | 15 | 169.5 | 11.3 | 14.7 / 791  | [14] |
| 91  | na          | na      | 8333  | 9  | 49.5  | 5.5  | 12.5 / 700  | [14] |
| 92  | na          | na      | 8333  | 9  | 73.8  | 8.2  | 12.5 / 700  | [14] |
| 93  | na          | na      | 8333  | 9  | 11.7  | 1.3  | 13 / 650    | [14] |
| 94  | na          | na      | 8333  | 9  | 85.5  | 9.5  | 12.5 / 700  | [14] |
| 95  | na          | na      | 8333  | 10 | 44    | 4.4  | 13 / 800    | [14] |
| 96  | na          | na      | 5560  | 10 | 160   | 16   | 12 / 745    | [14] |
| 97  | na          | na      | 5560  | 10 | 200   | 20   | 12 / 745    | [14] |
| 98  | na          | na      | 21000 | 13 | 185.9 | 14.3 | 9.8 / 532   | [14] |
| 99  | na          | na      | 12500 | na | na    | 10.2 | 7.2 / 730   | [14] |
| 100 | na          | na      | 2222  | 16 | 51.2  | 3.2  | 5.7 / 800   | [14] |
| 101 | na          | na      | 2222  | 16 | 115.2 | 7.2  | 6.8 / 650   | [14] |
| 102 | na          | na      | 7407  | 12 | 158.4 | 13.2 | 8.5 / 500   | [14] |
| 103 | na          | na      | 1556  | 14 | 78.4  | 5.6  | 7 / 625     | [14] |
| 104 | na          | na      | 13500 | 3  | 30.3  | 10.1 | 7.2 / 820   | [14] |
| 105 | na          | na      | 10317 | na | na    | 9.4  | 7.2 / 820   | [14] |

|     |          |                     |       |    |       |      |             |      |
|-----|----------|---------------------|-------|----|-------|------|-------------|------|
| 106 | na       | na                  | 11850 | 8  | 90.4  | 11.3 | 7.2 / 820   | [14] |
| 107 | na       | na                  | 6667  | 4  | 14    | 3.5  | 9.8 / 821   | [14] |
| 108 | na       | na                  | 10000 | 16 | 83.2  | 5.2  | 11.1 / 824  | [14] |
| 109 | na       | na                  | 8000  | 2  | 8     | 4.0  | 9.5 / 726   | [14] |
| 110 | na       | na                  | 9300  | 7  | 54.6  | 7.8  | 7.8 / 700   | [14] |
| 111 | na       | na                  | 10400 | 5  | 73.5  | 14.7 | 8.5 / 580   | [14] |
| 112 | na       | na                  | 12083 | 6  | 54.6  | 9.1  | 8.5 / 680   | [14] |
| 113 | na       | na                  | 2944  | 15 | 43.5  | 2.9  | 8.5 / 575   | [14] |
| 114 | na       | na                  | na    | na | na    | 7    | 8.5 / 575   | [14] |
| 115 | na       | na                  | 3075  | 15 | 106.5 | 7.1  | 8.5 / 575   | [14] |
| 116 | na       | na                  | 2971  | 15 | 42    | 2.8  | 8.5 / 650   | [14] |
| 117 | na       | na                  | 27778 | 7  | 23.8  | 3.4  | 8.5 / 550   | [14] |
| 118 | na       | na                  | 3793  | 17 | 219.3 | 12.9 | 8.1 / 690   | [14] |
| 119 | na       | na                  | 3246  | 17 | 156.4 | 9.2  | 8.1 / 690   | [14] |
| 120 | na       | na                  | 14000 | 5  | 29.75 | 5.95 | 8.5 / 520   | [14] |
| 121 | na       | na                  | 17778 | na | na    | 8    | 9.3 / 750   | [14] |
| 122 | na       | na                  | 25000 | na | na    | 7.7  | 8.2 / 616   | [14] |
| 123 | na       | na                  | 22000 | na | na    | 23.9 | 8 / 630     | [14] |
| 124 | na       | na                  | 15000 | 21 | 231   | 11   | 10.1 / 1050 | [14] |
| 125 | na       | na                  | 12000 | 16 | 147.2 | 9.2  | 7.3 / 637   | [14] |
| 126 | na       | na                  | 20000 | 12 | 109.2 | 9.1  | 4.7 / 600   | [14] |
| 127 | na       | na                  | 11500 | 15 | 142.5 | 9.5  | 5.5 / 630   | [14] |
| 128 | J-104    | Twin-rows 2.6 x 0.7 | 10000 | 6  | 71.4  | 11.9 | 7.3 / 590   | [15] |
| 129 | J-105    | Twin-rows 2.6 x 0.7 | 10000 | 6  | 83.4  | 13.9 | 7.3 / 590   | [15] |
| 130 | P494     | Twin-rows 2.6 x 0.7 | 10000 | 6  | 61.2  | 10.2 | 7.3 / 590   | [15] |
| 131 | P524     | Twin-rows 2.6 x 0.7 | 10000 | 6  | 48.6  | 8.1  | 7.3 / 590   | [15] |
| 132 | P473     | Twin-rows 2.6 x 0.7 | 10000 | 6  | 58.2  | 9.7  | 7.3 / 590   | [15] |
| 133 | NM5      | 1.67 x 0.33         | 18000 | 4  | 66.48 | 16.6 | 6.4 / 954   | [16] |
| 134 | NM6      | 1.67 x 0.33         | 18000 | 4  | 72.2  | 18.1 | 6.4 / 954   | [16] |
| 135 | NM5      | 1.67 x 0.33         | 18000 | 3  | 50    | 16.7 | 6.4 / 954   | [16] |
| 136 | NM6      | 1.67 x 0.33         | 18000 | 3  | 50.1  | 16.7 | 6.4 / 954   | [16] |
| 137 | NM5      | 1.67 x 0.33         | 18000 | 2  | 20.2  | 10.1 | 6.4 / 954   | [16] |
| 138 | NM6      | 1.67 x 0.33         | 18000 | 2  | 22    | 11.0 | 6.4 / 954   | [16] |
| 139 | NM5      | 1.67 x 0.33         | 18000 | 1  | 19.5  | 19.5 | 6.4 / 954   | [16] |
| 140 | NM6      | 1.67 x 0.33         | 18000 | 1  | 21    | 21.0 | 6.4 / 954   | [16] |
| 141 | 311-93   | 1 X 1               | 10000 | 1  | 0.4   | 0.4  | 11.2 / 644  | [17] |
| 142 | 309-74   | 1 X 1               | 10000 | 1  | 0.4   | 0.4  | 11.2 / 644  | [17] |
| 143 | 195-529  | 1 X 1               | 10000 | 1  | 0.7   | 0.7  | 11.2 / 644  | [17] |
| 144 | DN-14273 | 1 X 1               | 10000 | 1  | 0.5   | 0.5  | 11.2 / 644  | [17] |

|     |              |         |       |   |      |      |            |      |
|-----|--------------|---------|-------|---|------|------|------------|------|
| 145 | R-419        | 1 X 1   | 10000 | 1 | 0.7  | 0.7  | 11.2 / 644 | [17] |
| 146 | 52-225       | 1 X 1   | 10000 | 1 | 0.9  | 0.9  | 11.2 / 644 | [17] |
| 147 | 58-280       | 1 X 1   | 10000 | 1 | 1.0  | 1.0  | 11.2 / 644 | [17] |
| 148 | NE-353       | 1 X 1   | 10000 | 1 | 0.8  | 0.8  | 11.2 / 644 | [17] |
| 149 | PC-01        | 1 X 1   | 10000 | 1 | 0.1  | 0.1  | 11.2 / 644 | [17] |
| 150 | OP-367       | 1 X 1   | 10000 | 1 | 0.9  | 0.9  | 11.2 / 644 | [17] |
| 151 | DN-34        | 1 X 1   | 10000 | 1 | 0.9  | 0.9  | 11.2 / 644 | [17] |
| 152 | SIMPLOT      | 1 X 1   | 10000 | 1 | 0.9  | 0.9  | 11.2 / 644 | [17] |
| 153 | DN-70        | 1 X 1   | 10000 | 1 | 0.9  | 0.9  | 11.2 / 644 | [17] |
| 154 | R-247        | 1 X 1   | 10000 | 1 | 1.2  | 1.2  | 11.2 / 644 | [17] |
| 155 | 311-93       | 1 X 1   | 10000 | 2 | 5.2  | 2.6  | 11.2 / 644 | [17] |
| 156 | 309-74       | 1 X 1   | 10000 | 2 | 6.0  | 3.0  | 11.2 / 644 | [17] |
| 157 | 195-529      | 1 X 1   | 10000 | 2 | 7.7  | 3.9  | 11.2 / 644 | [17] |
| 158 | DN-14273     | 1 X 1   | 10000 | 2 | 6.9  | 3.5  | 11.2 / 644 | [17] |
| 159 | R-419        | 1 X 1   | 10000 | 2 | 9.4  | 4.7  | 11.2 / 644 | [17] |
| 160 | 52-225       | 1 X 1   | 10000 | 2 | 10.0 | 5.0  | 11.2 / 644 | [17] |
| 161 | 58-280       | 1 X 1   | 10000 | 2 | 11.0 | 5.5  | 11.2 / 644 | [17] |
| 162 | NE-353       | 1 X 1   | 10000 | 2 | 11.9 | 6.0  | 11.2 / 644 | [17] |
| 163 | PC-01        | 1 X 1   | 10000 | 2 | 14.2 | 7.1  | 11.2 / 644 | [17] |
| 164 | OP-367       | 1 X 1   | 10000 | 2 | 11.2 | 5.6  | 11.2 / 644 | [17] |
| 165 | DN-34        | 1 X 1   | 10000 | 2 | 14.3 | 7.2  | 11.2 / 644 | [17] |
| 166 | SIMPLOT      | 1 X 1   | 10000 | 2 | 13.8 | 6.9  | 11.2 / 644 | [17] |
| 167 | DN-70        | 1 X 1   | 10000 | 2 | 15.6 | 7.8  | 11.2 / 644 | [17] |
| 168 | R-247        | 1 X 1   | 10000 | 2 | 19.9 | 10.0 | 11.2 / 644 | [17] |
| 169 | 311-93       | 1 X 1   | 10000 | 3 | 9.5  | 3.2  | 11.2 / 644 | [17] |
| 170 | 309-74       | 1 X 1   | 10000 | 3 | 15.4 | 5.1  | 11.2 / 644 | [17] |
| 171 | 195-529      | 1 X 1   | 10000 | 3 | 17.3 | 5.8  | 11.2 / 644 | [17] |
| 172 | DN-14273     | 1 X 1   | 10000 | 3 | 25.2 | 8.4  | 11.2 / 644 | [17] |
| 173 | R-419        | 1 X 1   | 10000 | 3 | 29.1 | 9.7  | 11.2 / 644 | [17] |
| 174 | 52-225       | 1 X 1   | 10000 | 3 | 45.2 | 15.1 | 11.2 / 644 | [17] |
| 175 | 58-280       | 1 X 1   | 10000 | 3 | 48.5 | 16.2 | 11.2 / 644 | [17] |
| 176 | NE-353       | 1 X 1   | 10000 | 3 | 49.2 | 16.4 | 11.2 / 644 | [17] |
| 177 | PC-01        | 1 X 1   | 10000 | 3 | 53.4 | 17.8 | 11.2 / 644 | [17] |
| 178 | OP-367       | 1 X 1   | 10000 | 3 | 55.0 | 18.3 | 11.2 / 644 | [17] |
| 179 | DN-34        | 1 X 1   | 10000 | 3 | 58.2 | 19.4 | 11.2 / 644 | [17] |
| 180 | SIMPLOT      | 1 X 1   | 10000 | 3 | 66.7 | 22.2 | 11.2 / 644 | [17] |
| 181 | DN-70        | 1 X 1   | 10000 | 3 | 71.0 | 23.7 | 11.2 / 644 | [17] |
| 182 | R-247        | 1 X 1   | 10000 | 3 | 75.0 | 25.0 | 11.2 / 644 | [17] |
| 183 | Muhle Larsen | 2 x 0.6 | 8333  | 2 | 0.5  | 0.3  | 8.5 / 500  | [18] |

|     |              |         |      |   |      |     |           |      |
|-----|--------------|---------|------|---|------|-----|-----------|------|
| 184 | Rap          | 2 x 0.6 | 8333 | 2 | 2.5  | 1.3 | 8.5 / 500 | [18] |
| 185 | Beaupré      | 2 x 0.6 | 8333 | 2 | 3    | 1.5 | 8.5 / 500 | [18] |
| 186 | Max 1        | 2 x 0.6 | 8333 | 2 | 1.2  | 0.6 | 8.5 / 500 | [18] |
| 187 | Max 3        | 2 x 0.6 | 8333 | 2 | 1.2  | 0.6 | 8.5 / 500 | [18] |
| 188 | Max 4        | 2 x 0.6 | 8333 | 2 | 1.2  | 0.6 | 8.5 / 500 | [18] |
| 189 | Androscoggin | 2 x 0.6 | 8333 | 2 | 0.9  | 0.5 | 8.5 / 500 | [18] |
| 190 | Hybride 275  | 2 x 0.6 | 8333 | 2 | 1    | 0.5 | 8.5 / 500 | [18] |
| 191 | Muhle Larsen | 2 x 0.6 | 8333 | 3 | 4.1  | 1.4 | 8.5 / 500 | [18] |
| 192 | Rap          | 2 x 0.6 | 8333 | 3 | 7.2  | 2.4 | 8.5 / 500 | [18] |
| 193 | Beaupré      | 2 x 0.6 | 8333 | 3 | 11.6 | 3.9 | 8.5 / 500 | [18] |
| 194 | Max 1        | 2 x 0.6 | 8333 | 3 | 4.7  | 1.6 | 8.5 / 500 | [18] |
| 195 | Max 3        | 2 x 0.6 | 8333 | 3 | 4.7  | 1.6 | 8.5 / 500 | [18] |
| 196 | Max 4        | 2 x 0.6 | 8333 | 3 | 4    | 1.3 | 8.5 / 500 | [18] |
| 197 | Androscoggin | 2 x 0.6 | 8333 | 3 | 3.9  | 1.3 | 8.5 / 500 | [18] |
| 198 | Hybride 275  | 2 x 0.6 | 8333 | 3 | 4.8  | 1.6 | 8.5 / 500 | [18] |
| 199 | Muhle Larsen | 2 x 0.6 | 8333 | 4 | 8.4  | 2.1 | 8.5 / 500 | [18] |
| 200 | Rap          | 2 x 0.6 | 8333 | 4 | 17   | 4.3 | 8.5 / 500 | [18] |
| 201 | Beaupré      | 2 x 0.6 | 8333 | 4 | 19.6 | 4.9 | 8.5 / 500 | [18] |
| 202 | Max 1        | 2 x 0.6 | 8333 | 4 | 8.4  | 2.1 | 8.5 / 500 | [18] |
| 203 | Max 3        | 2 x 0.6 | 8333 | 4 | 8.5  | 2.1 | 8.5 / 500 | [18] |
| 204 | Max 4        | 2 x 0.6 | 8333 | 4 | 7    | 1.8 | 8.5 / 500 | [18] |
| 205 | Androscoggin | 2 x 0.6 | 8333 | 4 | 7.1  | 1.8 | 8.5 / 500 | [18] |
| 206 | Hybride 275  | 2 x 0.6 | 8333 | 4 | 8.8  | 2.2 | 8.5 / 500 | [18] |
| 207 | Muhle Larsen | 2 x 0.6 | 8333 | 5 | 15.4 | 3.1 | 8.5 / 500 | [18] |
| 208 | Rap          | 2 x 0.6 | 8333 | 5 | 28.1 | 5.6 | 8.5 / 500 | [18] |
| 209 | Beaupré      | 2 x 0.6 | 8333 | 5 | 30.1 | 6.0 | 8.5 / 500 | [18] |
| 210 | Max 1        | 2 x 0.6 | 8333 | 5 | 14.5 | 2.9 | 8.5 / 500 | [18] |
| 211 | Max 3        | 2 x 0.6 | 8333 | 5 | 15.8 | 3.2 | 8.5 / 500 | [18] |
| 212 | Max 4        | 2 x 0.6 | 8333 | 5 | 13.1 | 2.6 | 8.5 / 500 | [18] |
| 213 | Androscoggin | 2 x 0.6 | 8333 | 5 | 14   | 2.8 | 8.5 / 500 | [18] |
| 214 | Hybride 275  | 2 x 0.6 | 8333 | 5 | 18.7 | 3.7 | 8.5 / 500 | [18] |
| 215 | Muhle Larsen | 2 x 0.6 | 8333 | 6 | 21.5 | 3.6 | 8.5 / 500 | [18] |
| 216 | Rap          | 2 x 0.6 | 8333 | 6 | 36.2 | 6.0 | 8.5 / 500 | [18] |
| 217 | Beaupré      | 2 x 0.6 | 8333 | 6 | 38.4 | 6.4 | 8.5 / 500 | [18] |
| 218 | Max 1        | 2 x 0.6 | 8333 | 6 | 20   | 3.3 | 8.5 / 500 | [18] |
| 219 | Max 3        | 2 x 0.6 | 8333 | 6 | 21.5 | 3.6 | 8.5 / 500 | [18] |
| 220 | Max 4        | 2 x 0.6 | 8333 | 6 | 18   | 3.0 | 8.5 / 500 | [18] |
| 221 | Androscoggin | 2 x 0.6 | 8333 | 6 | 19.2 | 3.2 | 8.5 / 500 | [18] |
| 222 | Hybride 275  | 2 x 0.6 | 8333 | 6 | 25.2 | 4.2 | 8.5 / 500 | [18] |

|     |              |             |        |   |      |      |             |      |
|-----|--------------|-------------|--------|---|------|------|-------------|------|
| 223 | Muhle Larsen | 2 x 0.6     | 8333   | 7 | 27.5 | 3.9  | 8.5 / 500   | [18] |
| 224 | Rap          | 2 x 0.6     | 8333   | 7 | 43.8 | 6.3  | 8.5 / 500   | [18] |
| 225 | Beaupré      | 2 x 0.6     | 8333   | 7 | 46.4 | 6.6  | 8.5 / 500   | [18] |
| 226 | Max 1        | 2 x 0.6     | 8333   | 7 | 25.1 | 3.6  | 8.5 / 500   | [18] |
| 227 | Max 3        | 2 x 0.6     | 8333   | 7 | 26.8 | 3.8  | 8.5 / 500   | [18] |
| 228 | Max 4        | 2 x 0.6     | 8333   | 7 | 22.3 | 3.2  | 8.5 / 500   | [18] |
| 229 | Androscoggin | 2 x 0.6     | 8333   | 7 | 24.3 | 3.5  | 8.5 / 500   | [18] |
| 230 | Hybride 275  | 2 x 0.6     | 8333   | 7 | 32   | 4.6  | 8.5 / 500   | [18] |
| 231 | Muhle Larsen | 2 x 0.6     | 8333   | 8 | 29.5 | 3.7  | 8.5 / 500   | [18] |
| 232 | Rap          | 2 x 0.6     | 8333   | 8 | 45.9 | 5.7  | 8.5 / 500   | [18] |
| 233 | Beaupré      | 2 x 0.6     | 8333   | 8 | 48.6 | 6.1  | 8.5 / 500   | [18] |
| 234 | Max 1        | 2 x 0.6     | 8333   | 8 | 26   | 3.3  | 8.5 / 500   | [18] |
| 235 | Max 3        | 2 x 0.6     | 8333   | 8 | 28   | 3.5  | 8.5 / 500   | [18] |
| 236 | Max 4        | 2 x 0.6     | 8333   | 8 | 23.2 | 2.9  | 8.5 / 500   | [18] |
| 237 | Androscoggin | 2 x 0.6     | 8333   | 8 | 26.4 | 3.3  | 8.5 / 500   | [18] |
| 238 | Hybride 275  | 2 x 0.6     | 8333   | 8 | 33.2 | 4.2  | 8.5 / 500   | [18] |
| 239 | D-01         | 0.18 x 0.18 | 310000 | 1 | 3.2  | 3.2  | 10.3 / 1000 | [19] |
| 240 | D-01         | 0.3 x 0.3   | 110000 | 1 | 2.5  | 2.5  | 10.3 / 1000 | [19] |
| 241 | D-01         | 0.5 x 0.5   | 40000  | 1 | 2.6  | 2.6  | 10.3 / 1000 | [19] |
| 242 | D-01         | 1 x 1       | 10000  | 1 | 1.2  | 1.2  | 10.3 / 1000 | [19] |
| 243 | D-01         | 2 x 2       | 2500   | 1 | 0.4  | 0.4  | 10.3 / 1000 | [19] |
| 244 | D-01         | 0.18 x 0.18 | 310000 | 2 | 14   | 7.0  | 10.3 / 1000 | [19] |
| 245 | D-01         | 0.3 x 0.3   | 110000 | 2 | 12   | 6.0  | 10.3 / 1000 | [19] |
| 246 | D-01         | 0.5 x 0.5   | 40000  | 2 | 16.3 | 8.2  | 10.3 / 1000 | [19] |
| 247 | D-01         | 1 x 1       | 10000  | 2 | 6.2  | 3.1  | 10.3 / 1000 | [19] |
| 248 | D-01         | 2 x 2       | 2500   | 2 | 2.5  | 1.3  | 10.3 / 1000 | [19] |
| 249 | D-01         | 0.18 x 0.18 | 310000 | 3 | 22.5 | 7.5  | 10.3 / 1000 | [19] |
| 250 | D-01         | 0.3 x 0.3   | 110000 | 3 | 20.1 | 6.7  | 10.3 / 1000 | [19] |
| 251 | D-01         | 0.5 x 0.5   | 40000  | 3 | 32.4 | 10.8 | 10.3 / 1000 | [19] |
| 252 | D-01         | 1 x 1       | 10000  | 3 | 26.3 | 8.8  | 10.3 / 1000 | [19] |
| 253 | D-01         | 2 x 2       | 2500   | 3 | 14   | 4.7  | 10.3 / 1000 | [19] |
| 254 | D-01         | 0.18 x 0.18 | 310000 | 4 | 28.2 | 7.1  | 10.3 / 1000 | [19] |
| 255 | D-01         | 0.3 x 0.3   | 110000 | 4 | 25.1 | 6.3  | 10.3 / 1000 | [19] |
| 256 | D-01         | 0.5 x 0.5   | 40000  | 4 | 42.5 | 10.6 | 10.3 / 1000 | [19] |
| 257 | D-01         | 1 x 1       | 10000  | 4 | 38.3 | 9.6  | 10.3 / 1000 | [19] |
| 258 | D-01         | 2 x 2       | 2500   | 4 | 26.6 | 6.7  | 10.3 / 1000 | [19] |
| 259 | D-01         | 0.18 x 0.18 | 310000 | 5 | 36.2 | 7.2  | 10.3 / 1000 | [19] |
| 260 | D-01         | 0.3 x 0.3   | 110000 | 5 | 32.5 | 6.5  | 10.3 / 1000 | [19] |
| 261 | D-01         | 0.5 x 0.5   | 40000  | 5 | 55   | 11.0 | 10.3 / 1000 | [19] |

|     |      |             |        |   |      |      |             |      |
|-----|------|-------------|--------|---|------|------|-------------|------|
| 262 | D-01 | 1 x 1       | 10000  | 5 | 54.8 | 11.0 | 10.3 / 1000 | [19] |
| 263 | D-01 | 2 x 2       | 2500   | 5 | 41   | 8.2  | 10.3 / 1000 | [19] |
| 264 | H-11 | 0.18 x 0.18 | 310000 | 1 | 3.8  | 3.8  | 10.3 / 1000 | [19] |
| 265 | H-11 | 0.3 x 0.3   | 110000 | 1 | 2.5  | 2.5  | 10.3 / 1000 | [19] |
| 266 | H-11 | 0.5 x 0.5   | 40000  | 1 | 5.8  | 5.8  | 10.3 / 1000 | [19] |
| 267 | H-11 | 1 x 1       | 10000  | 1 | 2.6  | 2.6  | 10.3 / 1000 | [19] |
| 268 | H-11 | 2 x 2       | 2500   | 1 | 1    | 1.0  | 10.3 / 1000 | [19] |
| 269 | H-11 | 0.18 x 0.18 | 310000 | 2 | 12.5 | 6.3  | 10.3 / 1000 | [19] |
| 270 | H-11 | 0.3 x 0.3   | 110000 | 2 | 11   | 5.5  | 10.3 / 1000 | [19] |
| 271 | H-11 | 0.5 x 0.5   | 40000  | 2 | 22   | 11.0 | 10.3 / 1000 | [19] |
| 272 | H-11 | 1 x 1       | 10000  | 2 | 15   | 7.5  | 10.3 / 1000 | [19] |
| 273 | H-11 | 2 x 2       | 2500   | 2 | 7.5  | 3.8  | 10.3 / 1000 | [19] |
| 274 | H-11 | 0.18 x 0.18 | 310000 | 3 | 21   | 7.0  | 10.3 / 1000 | [19] |
| 275 | H-11 | 0.3 x 0.3   | 110000 | 3 | 18.5 | 6.2  | 10.3 / 1000 | [19] |
| 276 | H-11 | 0.5 x 0.5   | 40000  | 3 | 42   | 14.0 | 10.3 / 1000 | [19] |
| 277 | H-11 | 1 x 1       | 10000  | 3 | 36   | 12.0 | 10.3 / 1000 | [19] |
| 278 | H-11 | 2 x 2       | 2500   | 3 | 25   | 8.3  | 10.3 / 1000 | [19] |
| 279 | H-11 | 0.18 x 0.18 | 310000 | 4 | 28   | 7.0  | 10.3 / 1000 | [19] |
| 280 | H-11 | 0.3 x 0.3   | 110000 | 4 | 25.9 | 6.5  | 10.3 / 1000 | [19] |
| 281 | H-11 | 0.5 x 0.5   | 40000  | 4 | 62   | 15.5 | 10.3 / 1000 | [19] |
| 282 | H-11 | 1 x 1       | 10000  | 4 | 63   | 15.8 | 10.3 / 1000 | [19] |
| 283 | H-11 | 2 x 2       | 2500   | 4 | 48   | 12.0 | 10.3 / 1000 | [19] |
| 284 | H-11 | 0.18 x 0.18 | 310000 | 5 | 35.3 | 7.1  | 10.3 / 1000 | [19] |
| 285 | H-11 | 0.3 x 0.3   | 110000 | 5 | 32.5 | 6.5  | 10.3 / 1000 | [19] |
| 286 | H-11 | 0.5 x 0.5   | 40000  | 5 | 93.6 | 18.7 | 10.3 / 1000 | [19] |
| 287 | H-11 | 1 x 1       | 10000  | 5 | 92.5 | 18.5 | 10.3 / 1000 | [19] |
| 288 | H-11 | 2 x 2       | 2500   | 5 | 78   | 15.6 | 10.3 / 1000 | [19] |
| 289 | Lux  | 2 x 0.5     | 10000  | 1 | 9.9  | 9.9  | 13.8 / 750  | [20] |
| 290 | Lux  | 2 x 0.5     | 10000  | 2 | 27.6 | 13.8 | 13.8 / 750  | [20] |
| 291 | Lux  | 2 x 0.5     | 10000  | 3 | 49.2 | 16.4 | 13.8 / 750  | [20] |



## References

1. Dănilă, I.-C. *Cercetări Biometrice Privind Productivitatea Clonelor de Plop Hibrid În Culturi Cu Ciclu Scurt de Producție Din Nord-Estul României. Universitatea "Ștefan Cel Mare" Suceava, România; Suceava, 2019; ISBN 978-973-666-561-5.*
2. Benomar, L.; DesRochers, A.; Larocque, G. The Effects of Spacing on Growth, Morphology and Biomass Production and Allocation in Two Hybrid Poplar Clones Growing in the Boreal Region of Canada. *Trees* **2012**, *26*, 939–949, doi:10.1007/s00468-011-0671-6.
3. Zalesny Jr, R.S.; Hall, R.B.; Zalesny, J.A.; McMahon, B.G.; Berguson, W.E.; Stanosz, G.R. Biomass and Genotype× Environment Interactions of Populus Energy Crops in the Midwestern United States. *BioEnergy Research* **2009**, *2*, 106–122.
4. Paris, P.; Mareschi, L.; Sabatti, M.; Pisanelli, A.; Ecosse, A.; Nardin, F.; Scarascia-Mugnozza, G. Comparing Hybrid Populus Clones for SRF across Northern Italy after Two Biennial Rotations: Survival, Growth and Yield. *Biomass and Bioenergy* **2011**, *35*, 1524–1532.
5. di Matteo, G.; Sperandio, G.; Verani, S. Field Performance of Poplar for Bioenergy in Southern Europe after Two Coppicing Rotations: Effects of Clone and Planting Density. *iForest-Biogeosciences and Forestry* **2012**, *5*, 224.
6. Pannacci, E.; Bartolini, S.; Covarelli, G. Evaluation of Four Poplar Clones in a Short Rotation Forestry in Central Italy. *Italian Journal of Agronomy* **2009**, *4*, 191–198.
7. Sabatti, M.; Fabbrini, F.; Harfouche, A.; Beritognolo, I.; Mareschi, L.; Carlini, M.; Paris, P.; Scarascia-Mugnozza, G. Evaluation of Biomass Production Potential and Heating Value of Hybrid Poplar Genotypes in a Short-Rotation Culture in Italy. *Industrial Crops and Products* **2014**, *61*, 62–73.
8. Facciotto, G.; Bergante, S.; Mughini, G.; de LOS ANGELES, G.; M-NERVO, G. Biomass Production with Fast Growing Woody Plants for Energy Purposes in Italy. *Proceedings: Forestry in Achieving Millennium Goals. Novi Sad, Serbia* **2009**, 105–110.
9. Lazdiņa, D.; Bārdulis, A.; Bārdule, A.; Lazdiņš, A.; Zeps, M.; Jansons, Ā. The First Three-Year Development of ALASIA Poplar Clones AF2, AF6, AF7, AF8 in Biomass Short Rotation Coppice Experimental Cultures in Latvia. *Agronomy Research* **2014**, *12*, 543–552.
10. Fang, S.; Xu, X.; Lu, S.; Tang, L. Growth Dynamics and Biomass Production in Short-Rotation Poplar Plantations: 6-Year Results for Three Clones at Four Spacings. *Biomass and Bioenergy* **1999**, *17*, 415–425.
11. DeBell, D.S.; Clendenen, G.W.; Harrington, C.A.; Zasada, J.C. Tree Growth and Stand Development in Short-Rotation Populus Plantings: 7-Year Results for Two Clones at Three Spacings. *Biomass and Bioenergy* **1996**, *11*, 253–269.
12. Morhart, C.; Sheppard, J.; Spiecker, H. Above Ground Leafless Woody Biomass and Nutrient Content within Different Compartments of a P. Maximowiczii× P. Trichocarpa Poplar Clone. *Forests* **2013**, *4*, 471–487.
13. Morhart, C.; Sheppard, J.; Seidl, F.; Spiecker, H. Influence of Different Tillage Systems and Weed Treatments in the Establishment Year on the Final Biomass Production of Short Rotation Coppice Poplar. *Forests* **2013**, *4*, 849–867.
14. Djomo, S.N.; Ac, A.; Zenone, T.; de Groote, T.; Bergante, S.; Facciotto, G.; Sixto, H.; Ciria, P.C.; Weger, J.; Ceulemans, R. Energy Performances of Intensive and Extensive Short Rotation Cropping Systems for Woody Biomass Production in the EU. *Renewable and Sustainable Energy Reviews* **2015**, *41*, 845–854.
15. Trnka, M.; Trnka, M.; Fialová, J.; Koutecký, V.; Fajman, M.; Žalud, Z.; Hejduk, S. Biomass Production and Survival Rates of Selected Poplar Clones Grown under a Short-Rotation System on Arable Land. *Plant Soil Environ* **2008**, *54*, 78–88.

16. Labrecque, M.; Teodorescu, T.I. Field Performance and Biomass Production of 12 Willow and Poplar Clones in Short-Rotation Coppice in Southern Quebec (Canada). *Biomass and Bioenergy* **2005**, *29*, 1–9.
17. Guo, X.; Zhang, X. Performance of 14 Hybrid Poplar Clones Grown in Beijing, China. *Biomass and Bioenergy* **2010**, *34*, 906–911.
18. Bungart, R.; Hüttl, R.F. Growth Dynamics and Biomass Accumulation of 8-Year-Old Hybrid Poplar Clones in a Short-Rotation Plantation on a Clayey-Sandy Mining Substrate with Respect to Plant Nutrition and Water Budget. *European Journal of Forest Research* **2004**, *123*, 105–115.
19. DeBell, D.S.; Clendenen, G.W.; Zasadat, J.C. Growing Populus Biomass: Comparison of Woodgrass versus Wider-Spaced Short-Rotation Systems. *Biomass and Bioenergy* **1993**, *4*, 305–313.
20. Nassi o di Nasso, N.; Guidi, W.; Ragaglini, G.; Tozzini, C.; Bonari, E. Biomass Production and Energy Balance of a 12-year-old Short-rotation Coppice Poplar Stand under Different Cutting Cycles. *GCB Bioenergy* **2010**, *2*, 89–97.
