# Supplementary material
Source: MDPI journal article supplement (https://www.mdpi.com/1999-4907/13/7/1089)
Supplement: s1 [file s1]

| No. | Clone/ Rotation length (years)/ Planting density (trees·ha <sup>-1</sup> ) | Location     | No. of trees | Values         | Basal diameter (cm) | Height (m) | Stem volume (m <sup>3</sup> ) | Total biomass (Mg·ha <sup>-1</sup> ) | Stem biomass (Mg·ha <sup>-1</sup> ) | Branch biomass (Mg·ha <sup>-1</sup> ) |
|-----|----------------------------------------------------------------------------|--------------|--------------|----------------|---------------------|------------|-------------------------------|--------------------------------------|-------------------------------------|---------------------------------------|
| 1   | AF8/ 3/ 1667                                                               | Fântâna Mare | 10           | <i>Min</i>     | 5.59                | 4.60       | 0.0037                        | 4.98                                 | 3.43                                | 1.52                                  |
|     |                                                                            |              |              | <i>Max</i>     | 7.38                | 6.48       | 0.0074                        | 8.27                                 | 5.84                                | 2.43                                  |
|     |                                                                            |              |              | <i>Mean</i>    | 6.40                | 5.54       | 0.0052                        | 6.25                                 | 4.41                                | 1.84                                  |
|     |                                                                            |              |              | <i>Stdev.s</i> | 0.61                | 0.58       | 0.0013                        | 1.24                                 | 0.99                                | 0.29                                  |
| 2a  | AF8/ 2/ 2222                                                               | Fântâna Mare | 10           | <i>Min</i>     | 3.73                | 3.48       | 0.0008                        | 1.90                                 | 1.23                                | 0.67                                  |
|     |                                                                            |              |              | <i>Max</i>     | 6.66                | 4.98       | 0.0020                        | 7.85                                 | 5.22                                | 2.62                                  |
|     |                                                                            |              |              | <i>Mean</i>    | 4.64                | 3.97       | 0.0012                        | 3.24                                 | 2.13                                | 1.11                                  |
|     |                                                                            |              |              | <i>Stdev.s</i> | 0.86                | 0.42       | 0.0003                        | 1.70                                 | 1.14                                | 0.56                                  |
| 2b  | AF8/ 3/ 2222                                                               | Fântâna Mare | 10           | <i>Min</i>     | 6.12                | 5.32       | 0.0037                        | 8.34                                 | 5.70                                | 2.75                                  |
|     |                                                                            |              |              | <i>Max</i>     | 10.00               | 7.12       | 0.0074                        | 22.25                                | 14.88                               | 7.48                                  |
|     |                                                                            |              |              | <i>Mean</i>    | 7.27                | 5.87       | 0.0052                        | 11.07                                | 7.34                                | 3.85                                  |
|     |                                                                            |              |              | <i>Stdev.s</i> | 1.12                | 0.51       | 0.0013                        | 4.08                                 | 2.73                                | 1.38                                  |
| 3a  | AF2/ 2/ 2222                                                               | Fântâna Mare | 10           | <i>Min</i>     | 3.99                | 3.60       | 0.0012                        | 1.68                                 | 1.17                                | 0.52                                  |
|     |                                                                            |              |              | <i>Max</i>     | 5.72                | 4.93       | 0.0047                        | 6.99                                 | 4.32                                | 2.68                                  |
|     |                                                                            |              |              | <i>Mean</i>    | 4.87                | 4.37       | 0.0020                        | 4.46                                 | 2.95                                | 1.51                                  |
|     |                                                                            |              |              | <i>Stdev.s</i> | 0.51                | 0.43       | 0.0010                        | 1.55                                 | 0.98                                | 0.62                                  |
| 3b  | AF2/ 3/ 2222                                                               | Fântâna Mare | 10           | <i>Min</i>     | 6.34                | 6.03       | 0.0047                        | 8.65                                 | 5.99                                | 2.66                                  |
|     |                                                                            |              |              | <i>Max</i>     | 7.93                | 7.28       | 0.0132                        | 20.01                                | 12.82                               | 7.68                                  |
|     |                                                                            |              |              | <i>Mean</i>    | 7.14                | 6.72       | 0.0067                        | 14.51                                | 9.62                                | 4.89                                  |
|     |                                                                            |              |              | <i>Stdev.s</i> | 0.47                | 0.43       | 0.0024                        | 3.40                                 | 2.13                                | 1.47                                  |
| 4   | AF8/ 5/ 1667                                                               | Fântâna Mare | 30           | <i>Min</i>     | 9.15                | 8.60       | 0.0188                        | 18.92                                | 14.69                               | 3.99                                  |
|     |                                                                            |              |              | <i>Max</i>     | 13.68               | 12.40      | 0.0524                        | 44.62                                | 35.85                               | 10.19                                 |
|     |                                                                            |              |              | <i>Mean</i>    | 11.70               | 10.67      | 0.0337                        | 31.76                                | 25.28                               | 6.48                                  |
|     |                                                                            |              |              | <i>Stdev.s</i> | 1.04                | 0.95       | 0.0084                        | 6.00                                 | 5.29                                | 1.43                                  |
| 5   | AF2/ 5/ 1667                                                               | Fântâna Mare | 30           | <i>Min</i>     | 9.17                | 10.12      | 0.0205                        | 22.76                                | 16.44                               | 5.78                                  |
|     |                                                                            |              |              | <i>Max</i>     | 14.48               | 12.01      | 0.0518                        | 53.14                                | 38.77                               | 20.00                                 |
|     |                                                                            |              |              | <i>Mean</i>    | 11.99               | 11.00      | 0.0382                        | 38.49                                | 28.22                               | 10.28                                 |
|     |                                                                            |              |              | <i>Stdev.s</i> | 1.58                | 0.51       | 0.0083                        | 8.08                                 | 5.59                                | 3.38                                  |
| 6   | AF2/ 5/ 1667                                                               | Vicșani      | 10           | <i>Min</i>     | 11.86               | 11.85      | 0.0397                        | 41.49                                | 33.58                               | 6.82                                  |
|     |                                                                            |              |              | <i>Max</i>     | 14.95               | 13.2       | 0.0648                        | 54.78                                | 44.31                               | 10.47                                 |
|     |                                                                            |              |              | <i>Mean</i>    | 13.17               | 12.78      | 0.0505                        | 46.00                                | 37.01                               | 8.99                                  |
|     |                                                                            |              |              | <i>Stdev.s</i> | 0.79                | 0.38       | 0.0071                        | 3.89                                 | 3.46                                | 1.04                                  |
| 7   | AF8/ 6/ 1667                                                               | Dornești     | 10           | <i>Min</i>     | 12.03               | 12.12      | 0.0299                        | 43.27                                | 35.69                               | 7.59                                  |
|     |                                                                            |              |              | <i>Max</i>     | 16.96               | 13.20      | 0.0714                        | 78.03                                | 62.20                               | 19.04                                 |
|     |                                                                            |              |              | <i>Mean</i>    | 14.85               | 12.72      | 0.0572                        | 64.93                                | 50.01                               | 14.92                                 |
|     |                                                                            |              |              | <i>Stdev.s</i> | 1.46                | 0.35       | 0.0117                        | 10.61                                | 7.56                                | 3.43                                  |
| 8a  | AF2/ 4/ 2667                                                               | Dornești     | 20           | <i>Min</i>     | 8.14                | 9.75       | 0.0164                        | 25.06                                | 21.66                               | 3.40                                  |
|     |                                                                            |              |              | <i>Max</i>     | 13.03               | 11.00      | 0.0321                        | 51.92                                | 38.86                               | 13.06                                 |
|     |                                                                            |              |              | <i>Mean</i>    | 10.57               | 10.42      | 0.0234                        | 35.99                                | 29.27                               | 6.72                                  |
|     |                                                                            |              |              | <i>Stdev.s</i> | 1.22                | 0.39       | 0.0038                        | 7.733                                | 5.59                                | 3.21                                  |
| 8b  | AF2/ 5/ 2667                                                               | Dornești     | 20           | <i>Min</i>     | 9.80                | 11.12      | 0.0298                        | 39.77                                | 34.37                               | 5.40                                  |
|     |                                                                            |              |              | <i>Max</i>     | 15.89               | 12.50      | 0.0518                        | 84.17                                | 63.00                               | 21.17                                 |
|     |                                                                            |              |              | <i>Mean</i>    | 12.28               | 11.95      | 0.0380                        | 58.82                                | 47.84                               | 10.98                                 |
|     |                                                                            |              |              | <i>Stdev.s</i> | 1.64                | 0.47       | 0.0062                        | 10.20                                | 6.83                                | 3.58                                  |
| 9   | AF2/ 5/ 1333                                                               | Dornești     | 10           | <i>Min</i>     | 12.81               | 10.90      | 0.0364                        | 32.14                                | 26.36                               | 5.78                                  |
|     |                                                                            |              |              | <i>Max</i>     | 15.83               | 13.30      | 0.0565                        | 46.28                                | 37.79                               | 11.13                                 |
|     |                                                                            |              |              | <i>Mean</i>    | 14.35               | 11.97      | 0.0446                        | 39.16                                | 31.37                               | 7.79                                  |
|     |                                                                            |              |              | <i>Stdev.s</i> | 0.92                | 0.80       | 0.0075                        | 4.95                                 | 4.33                                | 1.67                                  |
| 10  | AF8/ 5/ 1333                                                               | Dornești     | 10           | <i>Min</i>     | 12.05               | 10.82      | 0.0310                        | 25.81                                | 21.85                               | 3.24                                  |
|     |                                                                            |              |              | <i>Max</i>     | 16.80               | 13.32      | 0.0596                        | 48.50                                | 40.55                               | 11.13                                 |
|     |                                                                            |              |              | <i>Mean</i>    | 14.86               | 12.05      | 0.0486                        | 40.18                                | 33.35                               | 6.83                                  |
|     |                                                                            |              |              | <i>Stdev.s</i> | 1.49                | 0.74       | 0.0083                        | 7.41                                 | 5.80                                | 2.18                                  |

**Table S2.** Summary table of data.
