# Supplementary material
Source: MDPI journal article supplement (https://www.mdpi.com/1999-4907/13/7/1089)
Supplement: s1 [file s1]

Archive with 4 entries (4 files):
- Figure S1 Precipitation and annual temperatures.PNG
- Table S1. Biomass yield for different rotation length, planting density and growing conditions.pdf
- Table S2. Summary table of data.pdf
- Table S3. Yield of short-rotation crops with different planting densities and rotation .pdf
