# Supplementary material
Source: MDPI journal article supplement (https://www.mdpi.com/1999-4907/13/7/1089)

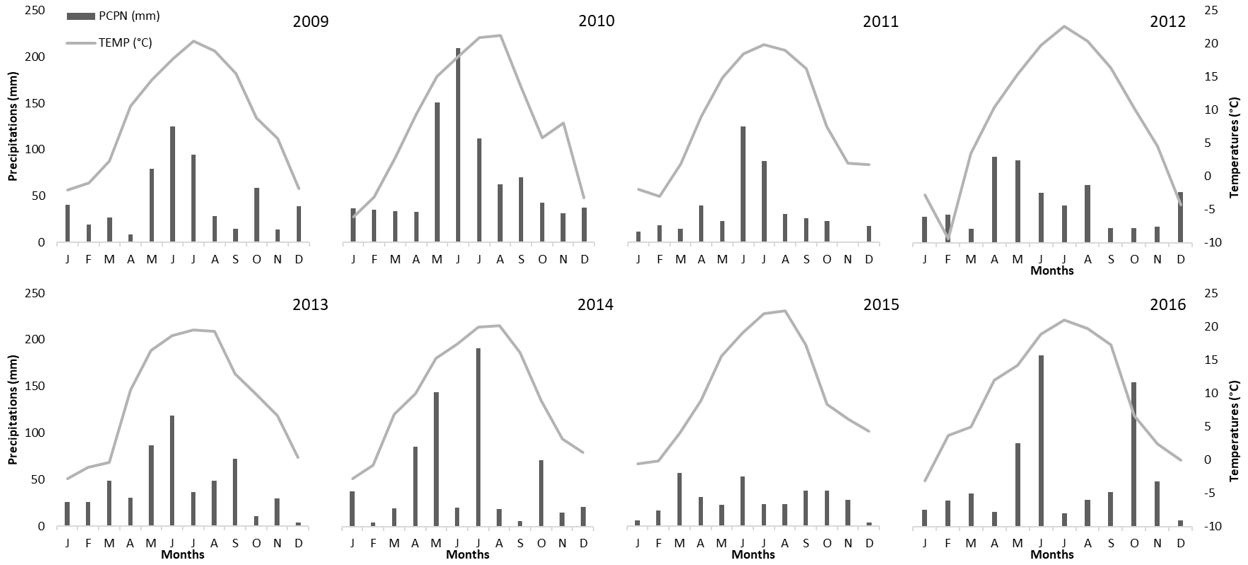

Supplement: s1 [file s1 › Figure S1 Precipitation and annual temperatures.PNG]
